# Supplementary material
Source: PubMed Central journal article supplement (PMC10125114)

## Supplementary Digital Content

### Table of contents

Table S1: Demographic characteristics of vaccinated solid organ and islet transplant recipients at 31 March 2022, by vaccine type.

Table S2: Demographic characteristics of solid organ and islet transplant recipients with SARS-CoV-2 infection and death within 28 days of the latest positive test, by vaccination status and vaccine type, 7 December 2020 to 31 March 2022. AZ, ChAdOx1-S vaccine; mRNA, BNT162b2 or mRNA-1273 vaccines.

Table S3: SARS-CoV-2 infection incidence rates and risk-adjusted incidence rate ratios in solid organ and islet transplant recipients by vaccine status, demographic variables, and month during the Omicron-dominant period, 20 December 2021 to 31 March 2022.

Table S4: Risk-adjusted survival model for death within 28 days of a SARS-CoV-2 infection in solid organ and islet transplant recipients, including vaccination status, 7 December 2020 to 31 March 2022.

Table S5: Risk-adjusted survival model for death within 28 days of a SARS-CoV-2 infection in solid organ and islet transplant recipients, including vaccination status and vaccine type, 7 December 2020 to 31 March 2022.

Figure S1: Time from effective date of latest vaccination to last reported positive SARS-CoV-2 test in days, 7 December 2020 to 31 March 2022.

Table S1: Demographic characteristics of vaccinated solid organ and islet transplant recipients at 31 March 2022, by vaccine type.

| Variable                               | Vaccine type  |      |                 |     |                         |      |                           |      |                            |      |                              |      | p-value |
|----------------------------------------|---------------|------|-----------------|-----|-------------------------|------|---------------------------|------|----------------------------|------|------------------------------|------|---------|
|                                        | AZ spine only |      | mRNA spine only |     | AZ spine + mRNA booster |      | mRNA spine + mRNA booster |      | AZ spine + 2 mRNA boosters |      | mRNA spine + 2 mRNA boosters |      |         |
|                                        | N             | %    | N               | %   | N                       | %    | N                         | %    | N                          | %    | N                            | %    |         |
| <b>Total</b>                           | 2285          | 5.7  | 1537            | 3.8 | 11 086                  | 27.7 | 7639                      | 19.1 | 9637                       | 24   | 7908                         | 19.7 |         |
| <b>Transplant type</b>                 |               |      |                 |     |                         |      |                           |      |                            |      |                              |      |         |
| Kidney <sup>a</sup>                    | 1638          | 5.7  | 1110            | 3.9 | 7718                    | 27   | 5516                      | 19.3 | 6692                       | 23.4 | 5891                         | 20.6 | <0.0001 |
| SPK <sup>b</sup>                       | 79            | 5.2  | 39              | 2.5 | 434                     | 28.4 | 307                       | 20.1 | 392                        | 25.6 | 279                          | 18.2 |         |
| Liver                                  | 374           | 5.4  | 246             | 3.6 | 2041                    | 29.5 | 1312                      | 19   | 1729                       | 25   | 1221                         | 17.6 |         |
| Heart                                  | 97            | 5.6  | 75              | 4.3 | 520                     | 29.9 | 307                       | 17.6 | 444                        | 25.5 | 297                          | 17.1 |         |
| Lung <sup>c</sup>                      | 81            | 7.4  | 51              | 4.7 | 327                     | 29.9 | 170                       | 15.6 | 300                        | 27.4 | 164                          | 15   |         |
| Intestinal and multiorgan <sup>d</sup> | 16            | 6.6  | 16              | 6.6 | 46                      | 19.1 | 27                        | 11.2 | 80                         | 33.2 | 56                           | 23.2 |         |
| <b>Ethnicity</b>                       |               |      |                 |     |                         |      |                           |      |                            |      |                              |      |         |
| White                                  | 1445          | 4.7  | 896             | 2.9 | 8027                    | 26.3 | 5443                      | 17.8 | 8202                       | 26.8 | 6559                         | 21.5 | <0.0001 |
| Asian                                  | 444           | 9.9  | 363             | 8.1 | 1532                    | 34.3 | 1053                      | 23.5 | 565                        | 12.6 | 515                          | 11.5 |         |
| Black                                  | 256           | 12.9 | 169             | 8.5 | 721                     | 36.2 | 500                       | 25.1 | 170                        | 8.5  | 176                          | 8.8  |         |
| Other                                  | 60            | 5.6  | 59              | 5.5 | 321                     | 29.9 | 294                       | 27.4 | 175                        | 16.3 | 163                          | 15.2 |         |
| Unknown                                | 80            | 4    | 50              | 2.5 | 485                     | 24.4 | 349                       | 17.6 | 525                        | 26.5 | 495                          | 24.9 |         |
| <b>Age (years)</b>                     |               |      |                 |     |                         |      |                           |      |                            |      |                              |      |         |
| 16-49                                  | 1057          | 8    | 720             | 5.5 | 4092                    | 31.1 | 2843                      | 21.6 | 2393                       | 18.2 | 2035                         | 15.5 | <0.0001 |
| 50+                                    | 1228          | 4.6  | 817             | 3   | 6994                    | 25.9 | 4796                      | 17.8 | 7244                       | 26.9 | 5873                         | 21.8 |         |
| <b>Sex</b>                             |               |      |                 |     |                         |      |                           |      |                            |      |                              |      |         |
| Male                                   | 1394          | 5.7  | 933             | 3.8 | 6896                    | 28.3 | 4681                      | 19.2 | 5759                       | 23.6 | 4710                         | 19.3 | 0.001   |
| Female                                 | 891           | 5.7  | 604             | 3.8 | 4190                    | 26.7 | 2958                      | 18.8 | 3878                       | 24.7 | 3198                         | 20.3 |         |
| <b>Time from transplant</b>            |               |      |                 |     |                         |      |                           |      |                            |      |                              |      |         |
| <90 days                               | 42            | 5.1  | 26              | 3.2 | 359                     | 44   | 260                       | 31.9 | 69                         | 8.5  | 60                           | 7.4  | <0.0001 |
| 90 days - 1 year                       | 155           | 7.9  | 115             | 5.8 | 556                     | 28.2 | 424                       | 21.5 | 375                        | 19   | 348                          | 17.6 |         |
| >1 year                                | 2088          | 5.6  | 1396            | 3.7 | 10 171                  | 27.3 | 6955                      | 18.6 | 9193                       | 24.6 | 7500                         | 20.1 |         |
| <b>NHS region</b>                      |               |      |                 |     |                         |      |                           |      |                            |      |                              |      |         |
| East of England                        | 235           | 4.8  | 134             | 2.7 | 1341                    | 27.2 | 821                       | 16.6 | 1382                       | 28   | 1021                         | 20.7 | <0.0001 |
| London                                 | 507           | 7.5  | 397             | 5.9 | 2000                    | 29.5 | 1822                      | 26.9 | 891                        | 13.2 | 1158                         | 17.1 |         |
| Midlands                               | 459           | 6.3  | 293             | 4   | 2080                    | 28.5 | 1257                      | 17.2 | 1779                       | 24.4 | 1420                         | 19.5 |         |

|                          |     |     |     |     |      |      |      |      |      |      |      |      |
|--------------------------|-----|-----|-----|-----|------|------|------|------|------|------|------|------|
| North East and Yorkshire | 345 | 5.4 | 205 | 3.2 | 1722 | 27.2 | 999  | 15.8 | 1855 | 29.3 | 1212 | 19.1 |
| North West               | 290 | 6.2 | 235 | 5   | 1260 | 26.9 | 1119 | 23.9 | 788  | 16.8 | 985  | 21.1 |
| South East               | 288 | 4.7 | 173 | 2.8 | 1651 | 27   | 1039 | 17   | 1619 | 26.5 | 1346 | 22   |
| South West               | 161 | 4.1 | 100 | 2.5 | 1032 | 26   | 582  | 14.7 | 1323 | 33.4 | 766  | 19.3 |

<sup>a</sup>Includes single kidney, en-bloc kidney and double kidney transplants

<sup>b</sup>Simultaneous pancreas-kidney transplants, including pancreas only, islet only and simultaneous islet-kidney transplants

<sup>c</sup>Includes single lung, double lung, partial lung and heart-lung transplants

<sup>d</sup>Includes if any other organ was transplanted with the intestine as well as liver-kidney, heart-lung-liver, liver-pancreas, heart-kidney, heart-liver, and lung-liver transplants

AZ – ChAdOx1-S vaccine, mRNA – BNT162b2 and mRNA-1273 vaccines

Table S2: Demographic characteristics of solid organ and islet transplant recipients with SARS-CoV-2 infection and death within 28 days of the latest positive test, by vaccination status and vaccine type, 7 December 2020 to 31 March 2022. AZ, ChAdOx1-S vaccine; mRNA, BNT162b2 or mRNA-1273 vaccines.

| Variable                                | Unvaccinated |     |        | AZ spine only |     |        | mRNA spine only |     |        | AZ spine + mRNA booster |    |        | mRNA spine + mRNA booster |    |        | AZ spine + 2 mRNA boosters |   |        | mRNA spine + 2 mRNA boosters |   |        | p-value |
|-----------------------------------------|--------------|-----|--------|---------------|-----|--------|-----------------|-----|--------|-------------------------|----|--------|---------------------------|----|--------|----------------------------|---|--------|------------------------------|---|--------|---------|
|                                         | Cases        |     | Deaths | Cases         |     | Deaths | Cases           |     | Deaths | Cases                   |    | Deaths | Cases                     |    | Deaths | Cases                      |   | Deaths | Cases                        |   | Deaths |         |
|                                         | N            | N   | %      | N             | N   | %      | N               | N   | %      | N                       | N  | %      | N                         | N  | %      | N                          | N | %      | N                            | N | %      |         |
| <b>Total</b>                            | 1764         | 210 | 11.9   | 2157          | 160 | 7.4    | 1308            | 105 | 8      | 3214                    | 95 | 3      | 2488                      | 58 | 2.3    | 778                        | 8 | 1      | 745                          | 6 | 0.8    |         |
| <b>Transplant type</b>                  |              |     |        |               |     |        |                 |     |        |                         |    |        |                           |    |        |                            |   |        |                              |   |        |         |
| Kidney <sup>a</sup>                     | 1333         | 155 | 11.6   | 1567          | 117 | 7.5    | 966             | 74  | 7.7    | 2279                    | 67 | 2.9    | 1891                      | 45 | 2.4    | 546                        | 4 | 0.7    | 587                          | 6 | 1      | 0.54    |
| SPK <sup>b</sup>                        | 58           | 8   | 13.8   | 91            | 3   | 3.3    | 54              | 3   | 5.6    | 137                     | 3  | 2.2    | 102                       | 1  | 1      | 28                         | 0 | 0      | 27                           | 0 | 0      |         |
| Liver                                   | 279          | 27  | 9.7    | 318           | 16  | 5      | 175             | 13  | 7.4    | 495                     | 10 | 2      | 314                       | 9  | 2.9    | 119                        | 2 | 1.7    | 80                           | 0 | 0      |         |
| Heart                                   | 57           | 8   | 14     | 110           | 7   | 6.4    | 70              | 10  | 14.3   | 171                     | 9  | 5.3    | 100                       | 1  | 1      | 43                         | 1 | 2.3    | 31                           | 0 | 0      |         |
| Lung <sup>c</sup>                       | 34           | 12  | 35.3   | 59            | 17  | 28.8   | 33              | 5   | 15.2   | 114                     | 6  | 5.3    | 67                        | 2  | 3      | 36                         | 1 | 2.8    | 14                           | 0 | 0      |         |
| Intestinal and multi-organ <sup>d</sup> | 3            | 0   | 0      | 12            | 0   | 0      | 10              | 0   | 0      | 18                      | 0  | 0      | 14                        | 0  | 0      | 6                          | 0 | 0      | 6                            | 0 | 0      |         |
| <b>Ethnicity</b>                        |              |     |        |               |     |        |                 |     |        |                         |    |        |                           |    |        |                            |   |        |                              |   |        |         |
| White                                   | 1029         | 122 | 11.9   | 1550          | 114 | 7.4    | 964             | 79  | 8.2    | 2527                    | 71 | 2.8    | 1929                      | 40 | 2.1    | 689                        | 8 | 1.2    | 641                          | 6 | 0.9    | 0.05*   |
| Asian                                   | 357          | 45  | 12.6   | 337           | 27  | 8      | 181             | 14  | 7.7    | 316                     | 11 | 3.5    | 248                       | 7  | 2.8    | 31                         | 0 | 0      | 53                           | 0 | 0      |         |
| Black                                   | 224          | 28  | 12.5   | 147           | 12  | 8.2    | 80              | 7   | 8.8    | 172                     | 5  | 2.9    | 97                        | 3  | 3.1    | 7                          | 0 | 0      | 9                            | 0 | 0      |         |
| Other                                   | 79           | 6   | 7.6    | 48            | 2   | 4.2    | 34              | 0   | 0      | 74                      | 4  | 5.4    | 82                        | 2  | 2.4    | 13                         | 0 | 0      | 12                           | 0 | 0      |         |
| Unknown                                 | 75           | 9   | 12     | 75            | 5   | 6.7    | 49              | 5   | 10.2   | 125                     | 4  | 3.2    | 132                       | 6  | 4.5    | 38                         | 0 | 0      | 30                           | 0 | 0      |         |
| <b>Age (years)</b>                      |              |     |        |               |     |        |                 |     |        |                         |    |        |                           |    |        |                            |   |        |                              |   |        |         |

|                             |      |     |      |      |     |      |      |     |      |      |    |     |      |    |     |     |   |     |     |   |     |       |
|-----------------------------|------|-----|------|------|-----|------|------|-----|------|------|----|-----|------|----|-----|-----|---|-----|-----|---|-----|-------|
| 16-49                       | 745  | 27  | 3.6  | 996  | 25  | 2.5  | 574  | 12  | 2.1  | 1296 | 8  | 0.6 | 1033 | 0  | 0   | 262 | 1 | 0.4 | 268 | 1 | 0.4 | 0.07  |
| 50+                         | 1019 | 183 | 18   | 1161 | 135 | 11.6 | 734  | 93  | 12.7 | 1918 | 87 | 4.5 | 1455 | 58 | 4   | 516 | 7 | 1.4 | 477 | 5 | 1   |       |
| <b>Sex</b>                  |      |     |      |      |     |      |      |     |      |      |    |     |      |    |     |     |   |     |     |   |     |       |
| Male                        | 1064 | 135 | 12.7 | 1299 | 108 | 8.3  | 775  | 71  | 9.2  | 1926 | 66 | 3.4 | 1473 | 43 | 2.9 | 449 | 7 | 1.6 | 422 | 2 | 0.5 | 0.33  |
| Female                      | 700  | 75  | 10.7 | 858  | 52  | 6.1  | 533  | 34  | 6.4  | 1288 | 29 | 2.3 | 1015 | 15 | 1.5 | 329 | 1 | 0.3 | 323 | 4 | 1.2 |       |
| <b>Time from transplant</b> |      |     |      |      |     |      |      |     |      |      |    |     |      |    |     |     |   |     |     |   |     |       |
| <90 days                    | 47   | 7   | 14.9 | 35   | 1   | 2.9  | 26   | 0   | 0    | 39   | 0  | 0   | 38   | 0  | 0   | 5   | 0 | 0   | 5   | 0 | 0   | 0.18  |
| 90 days - 1 year            | 103  | 9   | 8.7  | 116  | 8   | 6.9  | 81   | 1   | 1.2  | 165  | 2  | 1.2 | 115  | 2  | 1.7 | 39  | 0 | 0   | 36  | 0 | 0   |       |
| >1 year                     | 1614 | 194 | 12   | 2006 | 151 | 7.5  | 1201 | 104 | 8.7  | 3010 | 93 | 3.1 | 2335 | 56 | 2.4 | 734 | 8 | 1.1 | 704 | 6 | 0.9 |       |
| <b>NHS region</b>           |      |     |      |      |     |      |      |     |      |      |    |     |      |    |     |     |   |     |     |   |     |       |
| East of England             | 177  | 33  | 18.6 | 233  | 19  | 8.2  | 120  | 5   | 4.2  | 420  | 6  | 1.4 | 292  | 6  | 2.1 | 122 | 0 | 0   | 103 | 1 | 1   | 0.001 |
| London                      | 537  | 47  | 8.8  | 319  | 16  | 5    | 244  | 19  | 7.8  | 509  | 13 | 2.6 | 504  | 7  | 1.4 | 75  | 0 | 0   | 119 | 0 | 0   |       |
| Midlands                    | 333  | 47  | 14.1 | 460  | 43  | 9.3  | 229  | 22  | 9.6  | 599  | 22 | 3.7 | 436  | 16 | 3.7 | 125 | 2 | 1.6 | 132 | 1 | 0.8 |       |
| North East and<br>Yorkshire | 169  | 18  | 10.7 | 403  | 33  | 8.2  | 216  | 21  | 9.7  | 512  | 17 | 3.3 | 343  | 5  | 1.5 | 140 | 0 | 0   | 99  | 0 | 0   |       |
| North West                  | 207  | 22  | 10.6 | 272  | 19  | 7    | 231  | 16  | 6.9  | 325  | 15 | 4.6 | 367  | 8  | 2.2 | 67  | 3 | 4.5 | 88  | 0 | 0   |       |
| South East                  | 246  | 26  | 10.6 | 285  | 14  | 4.9  | 166  | 15  | 9    | 486  | 10 | 2.1 | 355  | 10 | 2.8 | 133 | 0 | 0   | 135 | 3 | 2.2 |       |
| South West                  | 95   | 17  | 17.9 | 185  | 16  | 8.6  | 102  | 7   | 6.9  | 363  | 12 | 3.3 | 191  | 6  | 3.1 | 116 | 3 | 2.6 | 69  | 1 | 1.4 |       |

<sup>a</sup>Includes single kidney, en-bloc kidney and double kidney transplants

<sup>b</sup>Simultaneous pancreas-kidney transplants, including pancreas only, islet only and simultaneous islet-kidney transplants

<sup>c</sup>Includes single lung, double lung, partial lung and heart-lung transplants

<sup>d</sup>Includes if any other organ was transplanted with the intestine as well as liver-kidney, heart-lung-liver, liver-pancreas, heart-kidney, heart-liver, and lung-liver transplants



Table S3: SARS-CoV-2 infection incidence rates and risk-adjusted incidence rate ratios in solid organ and islet transplant recipients by vaccine status, demographic variables, and month during the Omicron-dominant period, 20 December 2021 to 31 March 2022.

| Variable                               | Unvaccinated |                                        | Two doses |                                        | Three doses |                                        | Four doses |                                        | Risk-adjusted incidence rate ratio (95% CI) | p-value |
|----------------------------------------|--------------|----------------------------------------|-----------|----------------------------------------|-------------|----------------------------------------|------------|----------------------------------------|---------------------------------------------|---------|
|                                        | Cases        | Incidence rate per 100 000 person-days | Cases     | Incidence rate per 100 000 person-days | Cases       | Incidence rate per 100 000 person-days | Cases      | Incidence rate per 100 000 person-days |                                             |         |
| <b>Transplant type</b>                 |              |                                        |           |                                        |             |                                        |            |                                        |                                             |         |
| Kidney <sup>a</sup>                    | 181          | 150.2                                  | 519       | 172.2                                  | 3559        | 190.7                                  | 1139       | 243.5                                  | 1.00                                        | ..      |
| SPK <sup>b</sup>                       | 10           | 136.2                                  | 24        | 174.8                                  | 210         | 200.4                                  | 55         | 243.6                                  | 0.94 (0.83-1.06)                            | 0.3     |
| Liver                                  | 47           | 135.2                                  | 104       | 143.5                                  | 706         | 142.9                                  | 200        | 198.6                                  | 0.80 (0.74-0.86)                            | <0.001  |
| Heart                                  | 12           | 200.2                                  | 35        | 242.8                                  | 239         | 208.6                                  | 75         | 279.4                                  | 1.12 (1.00-1.25)                            | 0.05    |
| Lung <sup>c</sup>                      | 4            | 242.3                                  | 14        | 139.7                                  | 166         | 234.5                                  | 50         | 298.8                                  | 1.14 (1.00-1.31)                            | 0.05    |
| Intestinal and Multiorgan <sup>d</sup> | 2            | 153.0                                  | 6         | 172.6                                  | 26          | 190.4                                  | 12         | 246.5                                  | 0.93 (0.70-1.25)                            | 0.6     |
| <b>Ethnicity</b>                       |              |                                        |           |                                        |             |                                        |            |                                        |                                             |         |
| White                                  | 135          | 127.1                                  | 409       | 160.4                                  | 3823        | 186.5                                  | 1337       | 246.5                                  | 1.00                                        | ..      |
| Asian                                  | 34           | 159.6                                  | 161       | 191.0                                  | 493         | 176.0                                  | 84         | 240.1                                  | 0.91 (0.84-0.99)                            | 0.04    |
| Black                                  | 58           | 198.1                                  | 83        | 175.3                                  | 230         | 188.2                                  | 16         | 137.2                                  | 0.96 (0.86-1.08)                            | 0.5     |
| Other                                  | 20           | 249.1                                  | 27        | 182.2                                  | 136         | 184.1                                  | 26         | 219.8                                  | 0.96 (0.83-1.11)                            | 0.6     |
| Unknown                                | 9            | 134.2                                  | 22        | 156.1                                  | 224         | 162.5                                  | 68         | 176.0                                  | 0.87 (0.78-0.99)                            | 0.03    |
| <b>Age</b>                             |              |                                        |           |                                        |             |                                        |            |                                        |                                             |         |
| 16-49 years                            | 148          | 171.7                                  | 428       | 214.5                                  | 2051        | 259.5                                  | 539        | 372.3                                  | 1.00                                        | ..      |
| 50+ years                              | 108          | 126.7                                  | 274       | 126.9                                  | 2855        | 152.3                                  | 992        | 200.5                                  | 0.60 (0.56-0.63)                            | <0.001  |
| <b>Sex</b>                             |              |                                        |           |                                        |             |                                        |            |                                        |                                             |         |
| Male                                   | 149          | 136.2                                  | 382       | 149.8                                  | 2880        | 176.3                                  | 876        | 230.1                                  | 1.00                                        | ..      |
| Female                                 | 107          | 172.4                                  | 320       | 199.3                                  | 2026        | 196.5                                  | 655        | 253.2                                  | 1.15 (1.08-1.21)                            | <0.001  |
| <b>Region</b>                          |              |                                        |           |                                        |             |                                        |            |                                        |                                             |         |
| East of England                        | 24           | 157.7                                  | 65        | 150.2                                  | 608         | 180.1                                  | 226        | 268.9                                  | 0.94 (0.85-1.05)                            | 0.3     |
| London                                 | 98           | 187.3                                  | 178       | 179.7                                  | 847         | 192.4                                  | 195        | 236.6                                  | 1.00                                        | ..      |
| Midlands                               | 46           | 178.3                                  | 151       | 190.4                                  | 886         | 185.7                                  | 258        | 232.0                                  | 0.96 (0.87-1.05)                            | 0.3     |
| North East and Yorkshire               | 24           | 95.8                                   | 85        | 146.7                                  | 755         | 183.8                                  | 239        | 204.8                                  | 0.84 (0.76-0.92)                            | 0.0004  |
| North West                             | 28           | 146.4                                  | 98        | 186.6                                  | 605         | 198.9                                  | 158        | 257.0                                  | 0.99 (0.90-1.10)                            | 0.9     |

|              |     |       |     |       |      |       |      |       |                  |        |
|--------------|-----|-------|-----|-------|------|-------|------|-------|------------------|--------|
| South East   | 22  | 105.7 | 82  | 157.8 | 744  | 177.4 | 269  | 252.1 | 0.92 (0.83-1.01) | 0.09   |
| South West   | 14  | 106.4 | 43  | 136.5 | 461  | 167.7 | 186  | 241.9 | 0.87 (0.78-0.97) | 0.02   |
| <b>Month</b> |     |       |     |       |      |       |      |       |                  |        |
| December 21  | 67  | 304.0 | 248 | 137.2 | 1120 | 133.3 | 92   | 161.4 | 0.62 (0.57-0.68) | <0.001 |
| January 22   | 101 | 187.8 | 292 | 299.9 | 1965 | 241.0 | 254  | 473.8 | 1.06 (0.99-1.04) | 0.1    |
| February 22  | 40  | 85.8  | 66  | 94.9  | 800  | 140.1 | 1185 | 564.6 | 0.54 (0.50-0.58) | <0.001 |
| March 22     | 48  | 97.9  | 96  | 141.4 | 1021 | 233.1 | 1185 | 315.7 | 1.00             | ..     |

<sup>a</sup>Includes single kidney, en-bloc kidney and double kidney transplants

<sup>b</sup>Simultaneous pancreas-kidney transplants, including pancreas only, islet only and simultaneous islet-kidney transplants

<sup>c</sup>Includes single lung, double lung, partial lung and heart-lung transplants

<sup>d</sup>Includes if any other organ was transplanted with the intestine as well as liver-kidney, heart-lung-liver, liver-pancreas, heart-kidney, heart-liver, and lung-liver transplants



Table 4: Risk-adjusted survival model for death within 28 days of a SARS-CoV-2 infection in solid organ and islet transplant recipients, including vaccination status, 7 December 2020 to 31 March 2022.

| Variable                                                      | Cases  | Deaths |      | Hazard ratio | 95% hazard ratio confidence limits | p-value |
|---------------------------------------------------------------|--------|--------|------|--------------|------------------------------------|---------|
|                                                               |        | N      | %    |              |                                    |         |
| <b>Vaccination status at last positive test (p&lt;0.0001)</b> |        |        |      |              |                                    |         |
| No vaccine                                                    | 1764   | 210    | 11.9 | 1            | ..                                 | ..      |
| Two vaccine doses                                             | 3465   | 265    | 7.6  | 0.67         | 0.46-0.98                          | 0.04    |
| Three vaccine doses                                           | 5702   | 153    | 2.7  | 0.46         | 0.30-0.69                          | 0.0002  |
| Four vaccine doses                                            | 1523   | 14     | 0.9  | 0.18         | 0.09-0.35                          | <0.0001 |
| <b>Dominant variant period (p&lt;0.0001)</b>                  |        |        |      |              |                                    |         |
| Omicron                                                       | 7704   | 155    | 2    | 1            | ..                                 | ..      |
| Alpha                                                         | 1321   | 182    | 13.8 | 3.12         | 2.04-4.78                          | <0.0001 |
| Delta                                                         | 3429   | 305    | 8.9  | 2.86         | 2.18-3.76                          | <0.0001 |
| <b>Age at last positive test (years)</b>                      |        |        |      |              |                                    |         |
| 16-49                                                         | 4891   | 69     | 1.4  | 1            | ..                                 | ..      |
| 50+                                                           | 7563   | 573    | 7.6  | 5.7          | 4.43-7.35                          | <0.0001 |
| <b>Sex</b>                                                    |        |        |      |              |                                    |         |
| Male                                                          | 7408   | 432    | 5.8  | 1            | ..                                 | ..      |
| Female                                                        | 5046   | 210    | 4.2  | 0.79         | 0.66-0.93                          | 0.005   |
| <b>Time from transplant (p=0.07)</b>                          |        |        |      |              |                                    |         |
| More than 1 year                                              | 11 604 | 612    | 5.3  | 1            | ..                                 | ..      |
| Up to 90 days                                                 | 195    | 8      | 4.1  | 0.66         | 0.33-1.33                          | 0.3     |
| 90 days to 1 year                                             | 655    | 22     | 3.4  | 0.67         | 0.44-1.02                          | 0.06    |
| <b>Ethnicity (p=0.03)</b>                                     |        |        |      |              |                                    |         |
| White                                                         | 9329   | 440    | 4.7  | 1            | ..                                 | ..      |
| Asian                                                         | 1523   | 104    | 6.8  | 1.34         | 1.07-1.67                          | 0.01    |
| Black                                                         | 736    | 55     | 7.5  | 1.53         | 1.11-2.09                          | 0.008   |
| Other                                                         | 342    | 14     | 4.1  | 0.96         | 0.55-1.68                          | 0.9     |
| Unknown                                                       | 524    | 29     | 5.5  | 1.03         | 0.71-1.51                          | 0.9     |
| <b>Transplant type (p&lt;0.0001)</b>                          |        |        |      |              |                                    |         |
| Kidney <sup>a</sup>                                           | 9169   | 468    | 5.1  | 1            | ..                                 | ..      |
| SPK <sup>b</sup>                                              | 497    | 18     | 3.6  | 0.83         | 0.51-1.33                          | 0.4     |
| Liver                                                         | 1780   | 77     | 4.3  | 0.82         | 0.64-1.05                          | 0.1     |
| Heart                                                         | 582    | 36     | 6.2  | 1.46         | 1.03-2.07                          | 0.03    |
| Lung <sup>c</sup>                                             | 357    | 43     | 12   | 3.03         | 2.21-4.16                          | <0.0001 |
| Intestinal + multi-organ <sup>d</sup>                         | 69     | 0      | 0    | ..           | ..                                 | ..      |

| <i>NHS region (p=0-0001)</i> |      |     |     |      |           |         |
|------------------------------|------|-----|-----|------|-----------|---------|
| London                       | 2307 | 102 | 4.4 | 1    | ..        | ..      |
| North East and Yorkshire     | 1882 | 94  | 5   | 1.45 | 1.07-1.97 | 0.02    |
| North West                   | 1557 | 83  | 5.3 | 1.47 | 1.08-2.01 | 0.01    |
| Midlands                     | 2314 | 153 | 6.6 | 1.91 | 1.46-2.49 | <0.0001 |
| East of England              | 1467 | 70  | 4.8 | 1.55 | 1.12-2.14 | 0.008   |
| South East                   | 1806 | 78  | 4.3 | 1.27 | 0.93-1.74 | 0.1     |
| South West                   | 1121 | 62  | 5.5 | 1.8  | 1.29-2.53 | 0.0006  |

<sup>a</sup>Includes single kidney, en-bloc kidney and double kidney transplants

<sup>b</sup>Simultaneous pancreas-kidney transplants, including pancreas only, islet only and simultaneous islet-kidney transplants

<sup>c</sup>Includes single lung, double lung, partial lung and heart-lung transplants

<sup>d</sup>Includes if any other organ was transplanted with the intestine as well as liver-kidney, heart-lung-liver, liver-pancreas, heart-kidney, heart-liver, and lung-liver transplants

Table S5: Risk-adjusted survival model for death within 28 days of a SARS-CoV-2 infection in solid organ and islet transplant recipients, including vaccination status and vaccine type, 7 December 2020 to 31 March 2022.

| Variable                                                      | Cases  | Deaths |      | Hazard ratio | 95% hazard ratio confidence limits | p-value |
|---------------------------------------------------------------|--------|--------|------|--------------|------------------------------------|---------|
|                                                               |        | N      | %    |              |                                    |         |
| <b>Vaccination status at last positive test (p&lt;0-0001)</b> |        |        |      |              |                                    |         |
| Unvaccinated                                                  | 1764   | 210    | 11.9 | 1            | ..                                 | ..      |
| AZ spine only                                                 | 2157   | 160    | 7.4  | 0.66         | 0.44-0.97                          | 0.04    |
| mRNA spine only                                               | 1308   | 105    | 8    | 0.69         | 0.46-1.04                          | 0.08    |
| AZ spine + mRNA booster                                       | 3214   | 95     | 3    | 0.5          | 0.32-0.76                          | 0.002   |
| mRNA spine + mRNA booster                                     | 2488   | 58     | 2.3  | 0.4          | 0.25-0.64                          | <0.0001 |
| AZ spine + 2 mRNA boosters                                    | 778    | 8      | 1    | 0.19         | 0.09-0.43                          | <0.0001 |
| mRNA spine + 2 mRNA boosters                                  | 745    | 6      | 0.8  | 0.16         | 0.07-0.40                          | <0.0001 |
| <b>Variant (p&lt;0-0001)</b>                                  |        |        |      |              |                                    |         |
| Omicron                                                       | 7704   | 155    | 2    | 1            | ..                                 | ..      |
| Alpha                                                         | 1321   | 182    | 13.8 | 3.13         | 2.04-4.79                          | <0.0001 |
| Delta                                                         | 3429   | 305    | 8.9  | 2.87         | 2.18-3.77                          | <0.0001 |
| <b>Age at last positive test (years)</b>                      |        |        |      |              |                                    |         |
| 16-49                                                         | 4891   | 69     | 1.4  | 1            | ..                                 | ..      |
| 50+                                                           | 7563   | 573    | 7.6  | 5.7          | 4.43-7.34                          | <0.0001 |
| <b>Sex</b>                                                    |        |        |      |              |                                    |         |
| Male                                                          | 7408   | 432    | 5.8  | 1            | ..                                 | ..      |
| Female                                                        | 5046   | 210    | 4.2  | 0.79         | 0.67-0.93                          | 0.005   |
| <b>Time from transplant (p=0.07)</b>                          |        |        |      |              |                                    |         |
| More than 1 year                                              | 11 604 | 612    | 5.3  | 1            | ..                                 | ..      |
| Up to 90 days                                                 | 195    | 8      | 4.1  | 0.66         | 0.33-1.33                          | 0.3     |
| 90 days to 1 year                                             | 655    | 22     | 3.4  | 0.67         | 0.43-1.02                          | 0.06    |
| <b>Ethnicity (p=0.03)</b>                                     |        |        |      |              |                                    |         |
| White                                                         | 9329   | 440    | 4.7  | 1            | ..                                 | ..      |
| Asian                                                         | 1523   | 104    | 6.8  | 1.34         | 1.07-1.67                          | 0.01    |
| Black                                                         | 736    | 55     | 7.5  | 1.52         | 1.11-2.08                          | 0.009   |
| Other                                                         | 342    | 14     | 4.1  | 0.96         | 0.55-1.68                          | 0.9     |
| Unknown                                                       | 524    | 29     | 5.5  | 1.04         | 0.71-1.51                          | 0.9     |
| <b>Transplant type (p&lt;0-0001)</b>                          |        |        |      |              |                                    |         |
| Kidney <sup>a</sup>                                           | 9169   | 468    | 5.1  | 1            | ..                                 | ..      |
| SPK <sup>b</sup>                                              | 497    | 18     | 3.6  | 0.83         | 0.52-1.33                          | 0.4     |
| Liver                                                         | 1780   | 77     | 4.3  | 0.82         | 0.64-1.05                          | 0.1     |

|                                      |      |     |     |      |           |         |
|--------------------------------------|------|-----|-----|------|-----------|---------|
| Heart                                | 582  | 36  | 6.2 | 1.45 | 1.03-2.06 | 0.04    |
| Lung <sup>c</sup>                    | 357  | 43  | 12  | 3.02 | 2.2-4.14  | <0.0001 |
| Intestinal + multiorgan <sup>d</sup> | 69   | 0   | 0   | ..   | ..        | ..      |
| <b>NHS region (p=0.0001)</b>         |      |     |     |      |           |         |
| London                               | 2307 | 102 | 4.4 | 1    | ..        | ..      |
| North East and Yorkshire             | 1882 | 94  | 5   | 1.45 | 1.07-1.97 | 0.02    |
| North West                           | 1557 | 83  | 5.3 | 1.48 | 1.08-2.02 | 0.01    |
| Midlands                             | 2314 | 153 | 6.6 | 1.91 | 1.46-2.5  | <0.0001 |
| East of England                      | 1467 | 70  | 4.8 | 1.55 | 1.12-2.14 | 0.008   |
| South East                           | 1806 | 78  | 4.3 | 1.27 | 0.93-1.74 | 0.1     |
| South West                           | 1121 | 62  | 5.5 | 1.79 | 1.28-2.52 | 0.0007  |

<sup>a</sup>Includes single kidney, en-bloc kidney and double kidney transplants

<sup>b</sup>Simultaneous pancreas-kidney transplants, including pancreas only, islet only and simultaneous islet-kidney transplants

<sup>c</sup>Includes single lung, double lung, partial lung and heart-lung transplants

<sup>d</sup>Includes if any other organ was transplanted with the intestine as well as liver-kidney, heart-lung-liver, liver-pancreas, heart-kidney, heart-liver, and lung-liver transplants

Figure S1: Time from effective date of latest vaccination to last reported positive SARS-CoV-2 test in days, 7 December 2020 to 31 March 2022.

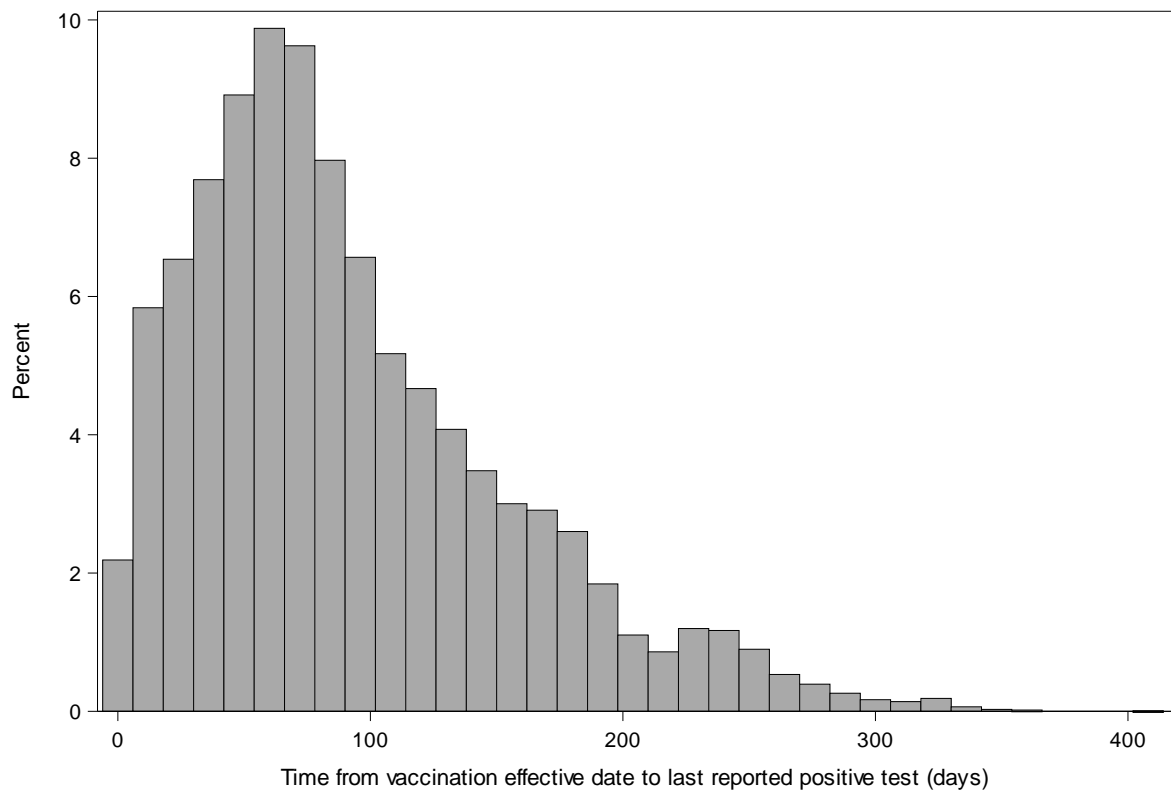

Supplement: tpa-107-1124-s001.pdf [file tpa-107-1124-s001.pdf]
